# Supplementary material for: Gene–environment interaction in neurodevelopmental disorders: Setd5 haploinsufficiency and prenatal carbon nanoparticle exposure synergistically induce ASD-like phenotypes in male mice
Source: Research Square preprint supplement (doi:10.21203/rs.3.rs-6530387/v1), 2025-05-05
Supplement: Supplementary file 1 [file f0007a2d468e43f409de9c70.docx]

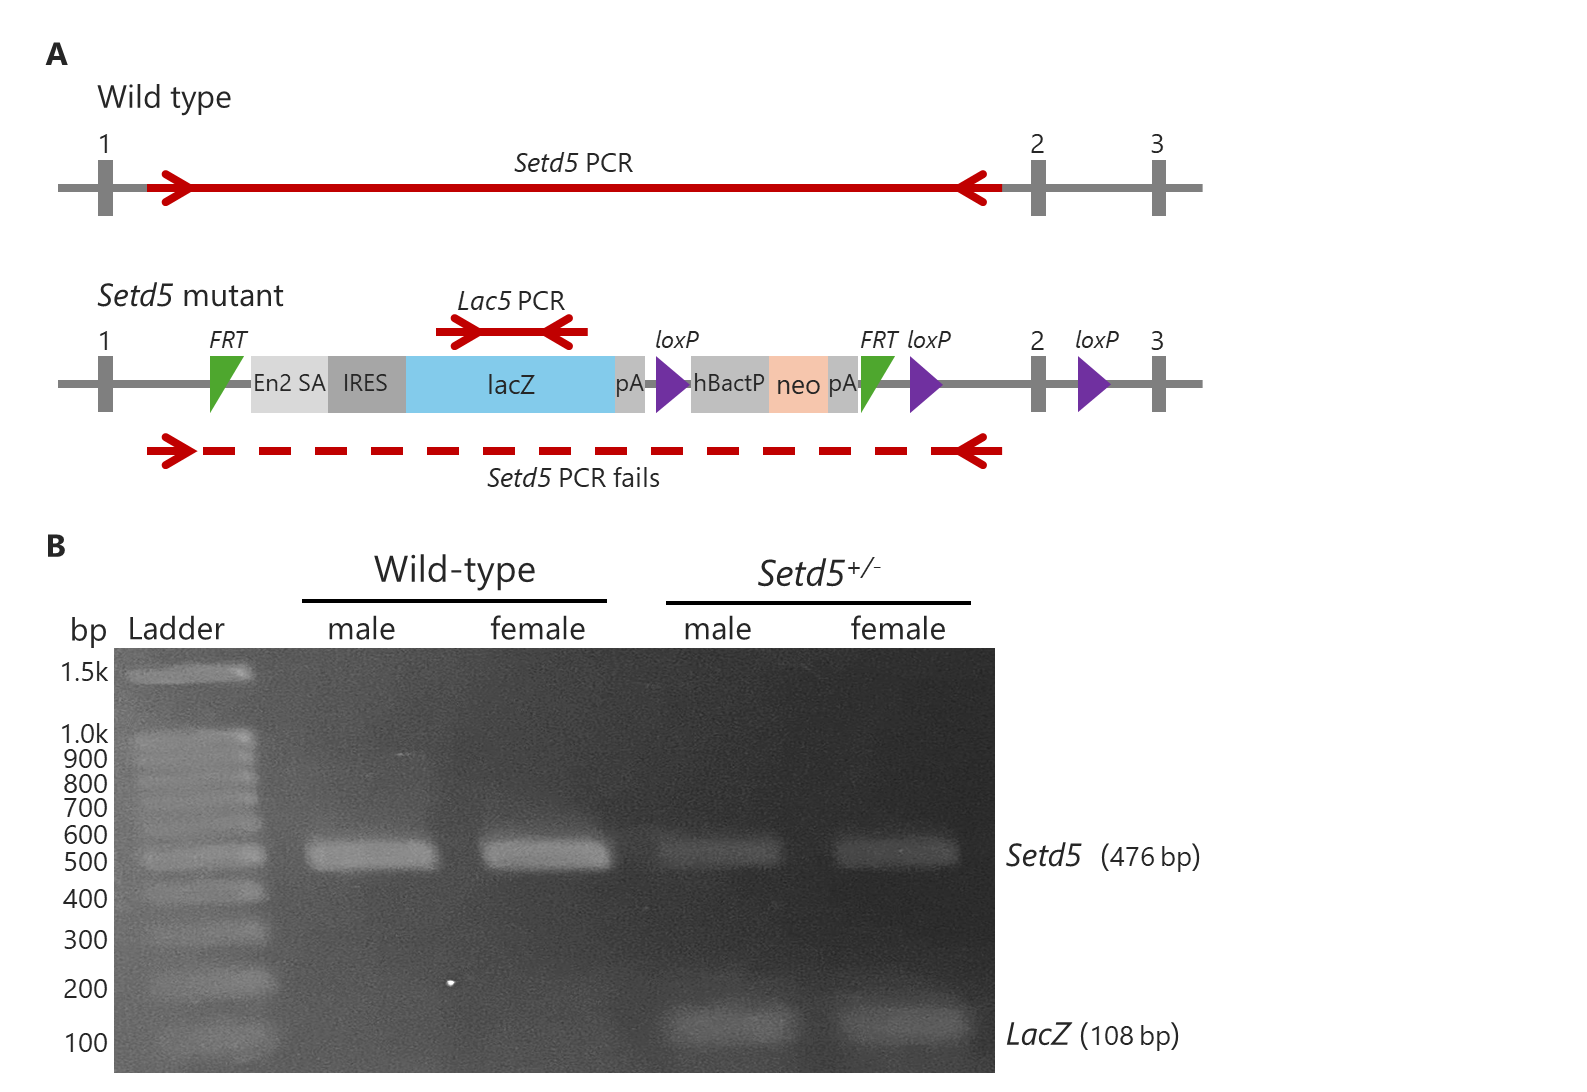


**Additional file 1. Characterization of the *Setd5* knockout-first allele.**

(A) Schematic diagram of the disrupted *Setd5* allele (*Setd5tm1a*(EUCOMM)Wtsi) showing the insertion of a lacZ-neomycin resistance (neo) cassette (promoter-driven targeting vector). This allele is a knockout-first design with reporter-tagged insertion and conditional potential. This figure was adapted from the datasheet provided by the Wellcome Trust Sanger Institute and the International Mouse Phenotyping Consortium website with modifications. (B) Representative polymerase chain reaction (PCR) analysis of *Setd5* and *lacZ* in adult mice in the wild-type (*Setd5*+/+) and *Setd5*+/− groups. The difference in *Setd5* band intensity, combined with the presence or absence of the *lacZ* band, confirmed the successful disruption of one *Setd5* allele in heterozygous (*Setd5*+/−) mice. Abbreviations: bp, base pairs; En2 SA, Engrailed 2 splice acceptor; FRT, FLP recombination target; hBactP, human β-actin promoter; IRES, Internal Ribosome Entry Site; lacZ, β-galactosidase; loxP, locus of crossover (x) in P1; neo, neomycin phosphotransferase II (nptII); pA, polyadenylation signal; PCR, polymerase chain reaction; Setd5+/−, SET domain-containing 5 heterozygous knockout; WT, wild-type.
